# Supplementary material for: Exercise prevents the negative impact of prolonged inactivity in Drosophila
Source: Research Square preprint supplement (doi:10.21203/rs.3.rs-6549792/v1), 2025-05-29
Supplement: Supplementary file 1 [file 7cde7f2af353f14475c17e1b.pdf]

1    **Exercise prevents the negative impact of prolonged inactivity in *Drosophila***

2    Jodi Protasiewicz<sup>1</sup>, Sarah Snider<sup>1</sup>, Mousumee Khan<sup>2,3</sup>, Li Tao<sup>2</sup>, Robert J. Wessells<sup>2</sup>, and Alyson  
3    Sujkowski<sup>1,4\*</sup>

4    <sup>1</sup>Department of Pharmacology, Wayne State University School of Medicine, Detroit, MI 48201,  
5    USA

6    <sup>2</sup>Department of Physiology, Wayne State University School of Medicine, Detroit, MI 48201, USA

7    <sup>3</sup>Department of Ophthalmology, Visual, and Anatomical Sciences, Wayne State University  
8    School of Medicine, Detroit, MI 48201, USA

9    <sup>4</sup>Department of Physical Therapy, Wayne State University Eugene Applebaum College of  
10    Pharmacy and Health Sciences, Detroit, MI 48201, USA

11    **\*Corresponding author** Alyson Sujkowski: Wayne State University School of Medicine,  
12    Department of Pharmacology, Detroit, MI 48201, USA. Email: [asujkows@med.wayne.edu](mailto:asujkows@med.wayne.edu)

**Figure S1**

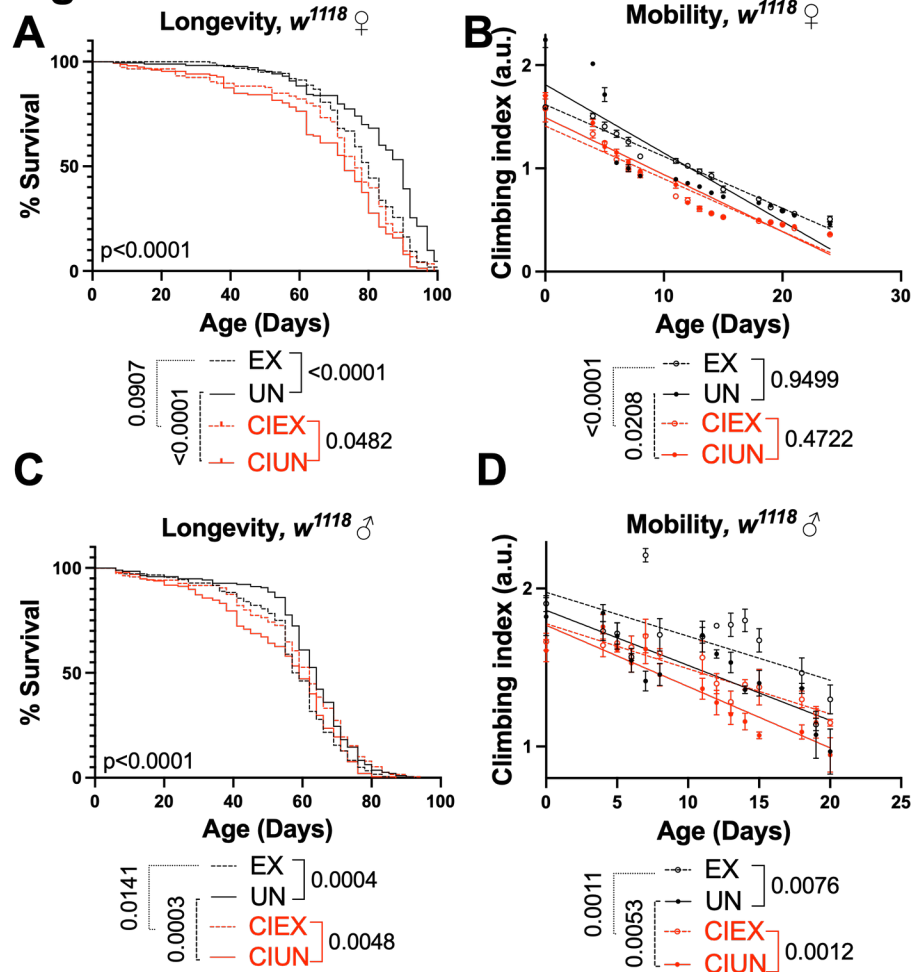

**Supplemental Figure S1: Additional confirmation of restraint and exercise effects in  $w^{1118}$  flies.** (A) Lifespan is improved in restrained female flies that complete 3 weeks of exercise when compared to unexercised, restrained siblings. (B) In this biological cohort, female flies that undergo CI have worse mobility than freely mobile flies whether exercised or not. A second cohort of exercised male flies that undergo mobility restriction have better lifespan (C) and mobility (D) than unexercised restrained siblings.  $n > 200$  flies per experiment. Exercise, mobility and longevity experiments were repeated a minimum of 3 times and in 3 genetic backgrounds ( $w^{1118}$ ,  $y^1w^1$ , and Canton S). Trends were similar in all genotypes, with representative cohorts depicted here.  $w^{1118}$ , and  $y^1w^1$  males showed the most consistent phenotypes in response to both restraint and exercise and were therefore used to complete the remaining experiments. Longevity analyzed by log-rank, mobility analyzed by linear regression, looking for differences in slope and intercept.

Supplemental Figure S2

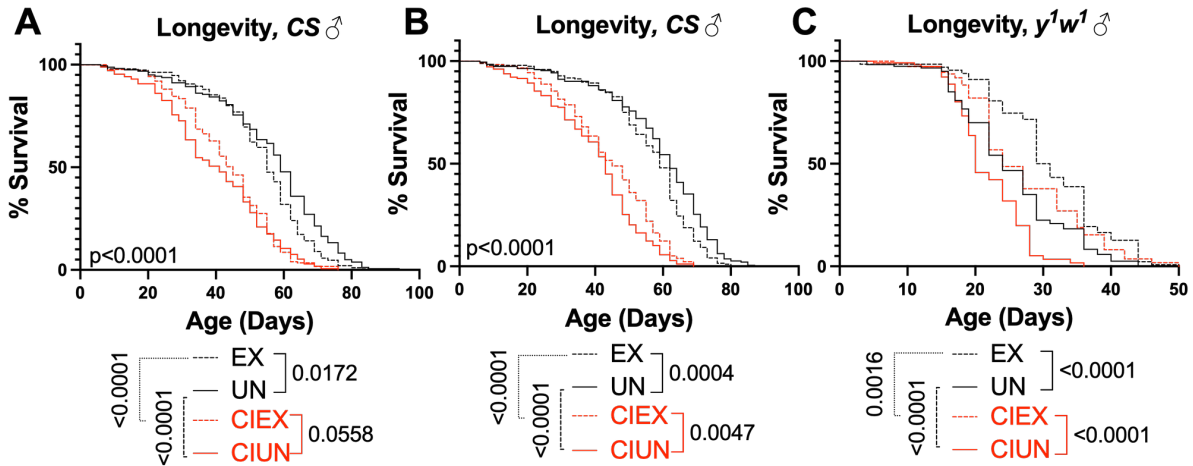

**Supplemental Figure S2: Lifespan is improved in restrained exercised flies of multiple genetic backgrounds.** Lifespan was assessed in duplicate biological replicates (A, B) of male *Canton S* flies under restraint stress. Exercise improved longevity in restrained flies but in one repetition (A) failed to achieve significance. (C) Exercise significantly improved lifespan in confined  $y^1w^1$  males.

## Supplemental Legends

**Supplemental Figure S1: Additional confirmation of restraint and exercise effects in  $w^{1118}$  flies.** (A) Lifespan is improved in restrained female flies that complete 3 weeks of exercise when compared to unexercised, restrained siblings. (B) In this biological cohort, female flies that undergo CI have worse mobility than freely mobile flies whether exercised or not. A second cohort of exercised male flies that undergo mobility restriction have better lifespan (C) and mobility (D) than unexercised restrained siblings.  $n > 200$  flies per experiment. Exercise, mobility and longevity experiments were repeated a minimum of 3 times and in 3 genetic backgrounds ( $w^{1118}$ ,  $y^1w^1$ , and Canton S). Trends were similar in all genotypes, with representative cohorts depicted here.  $w^{1118}$ , and  $y^1w^1$  males showed the most consistent phenotypes in response to both restraint and exercise and were therefore used to complete the remaining experiments. Longevity analyzed by log-rank, mobility analyzed by linear regression, looking for differences in slope and intercept.

**Supplemental Figure S2: Lifespan is improved in restrained exercised flies of multiple genetic backgrounds.** Lifespan was assessed in duplicate biological replicates (A, B) of male Canton S flies under restraint stress. Exercise improved longevity in restrained flies but in one repetition (A) failed to achieve significance. (C) Exercise significantly improved lifespan in confined  $y^1w^1$  males.
